# Supplementary material for: MicroRNA-200c increases radiosensitivity of human cancer cells with activated EGFR-associated signaling
Source: PubMed Central journal article supplement (PMC5630345; doi:10.18632/oncotarget.18924), 2017-07-03
Supplement: oncotarget-08-65457-s001.pdf [file oncotarget-08-65457-s001.pdf]

## MicroRNA-200c increases radiosensitivity of human cancer cells with activated EGFR-associated signaling

### SUPPLEMENTARY MATERIALS

miR-200c

| Cell \ SER | SF <sub>0.5</sub> | SF <sub>0.05</sub> |
|------------|-------------------|--------------------|
| U251       | 1.24              | 1.25               |
| T98G       | 1.05              | 1.11               |
| A549       | 1.20              | 1.18               |
| MDA-MB-468 | 1.12              | 1.10               |

Anti-miR-200c

| Cell \ SER | SF <sub>0.5</sub> | SF <sub>0.05</sub> |
|------------|-------------------|--------------------|
| U251       | 1.00              | 0.92               |
| T98G       | 0.86              | 0.88               |
| A549       | 1.00              | 0.88               |
| MDA-MB-468 | 0.94              | 0.88               |

Supplementary Data 1: Sensitizer enhancement ratio (SER).

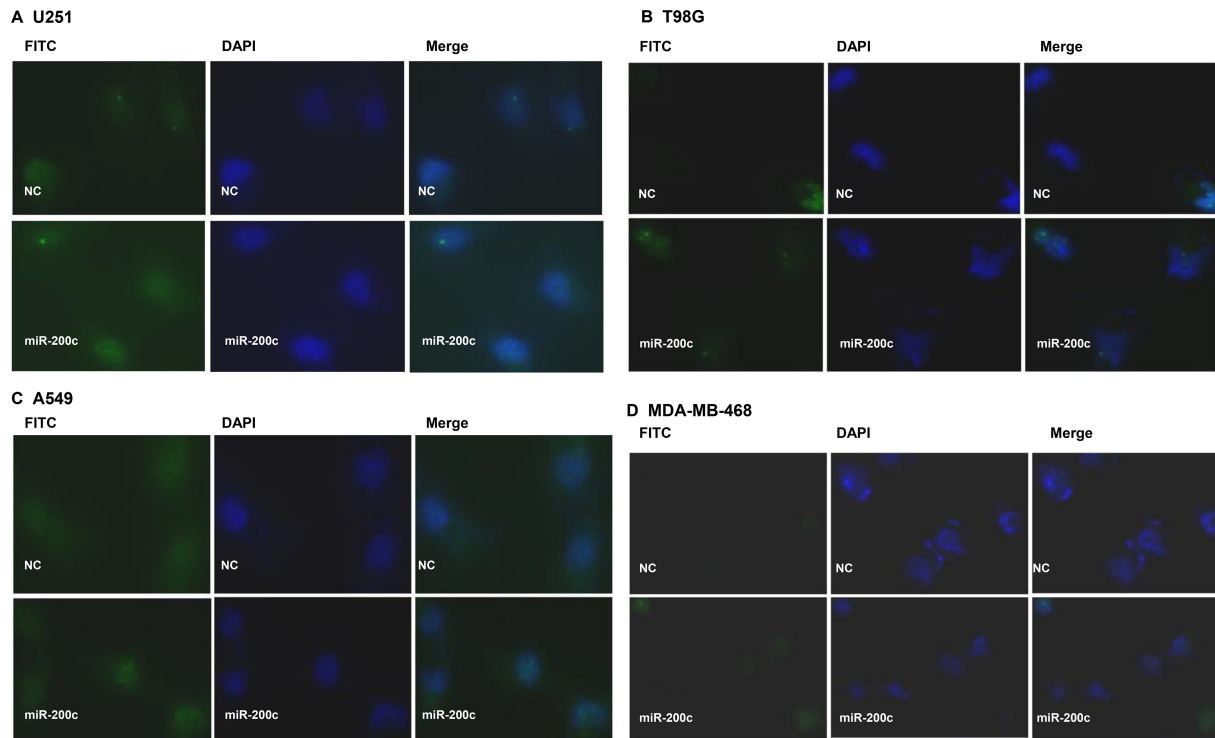

**Supplementary Data 2: Overexpression of miR-200c had no significant difference in  $\gamma$ H2AX focus formation unless radiation was delivered.**

| miRNA        | Gene (Protein)                           | miRWalk | miRanda | miRDB | Pictar2 | PITA | RNA22 | RNAhybrid | Targetscan | SUM |
|--------------|------------------------------------------|---------|---------|-------|---------|------|-------|-----------|------------|-----|
| hsa-miR-200c | <i>EGFR</i> (EGFR)                       | 1       | 1       | 0     | 0       | 0    | 1     | 1         | 1          | 5   |
| hsa-miR-200c | <i>PIK3CB</i> (PI3K)                     | 1       | 1       | 0     | 1       | 0    | 0     | 1         | 1          | 5   |
| hsa-miR-200c | <i>AKT2</i> (AKT)                        | 0       | 1       | 0     | 0       | 1    | 1     | 1         | 1          | 5   |
| hsa-miR-200c | <i>MAPK1</i> (ERK1/2)                    | 1       | 0       | 0     | 0       | 1    | 1     | 1         | 0          | 4   |
| hsa-miR-200c | <i>VEGFA</i> (VEGF)                      | 1       | 1       | 0     | 1       | 0    | 0     | 1         | 1          | 5   |
| hsa-miR-200c | <i>HIF1AN</i> (HIF-1 $\alpha$ inhibitor) | 1       | 1       | 1     | 0       | 1    | 0     | 1         | 1          | 6   |
| hsa-miR-200c | <i>CDH1</i> (E-cadherin)                 | 1       | 0       | 0     | 0       | 0    | 1     | 1         | 1          | 4   |

**Supplementary Data 3: Target gene prediction using miRNA target databases.**

**Supplementary Data 4: See Supplementary\_Data\_4**
